1 Running head: Branch-length models for multilocus phylogenetics

2

3 **Linking Branch Lengths Across Loci Provides the Best Fit for Phylogenetic**

4 **Inference**

5 David A. Duchêne<sup>1\*</sup>, K. Jun Tong<sup>1</sup>, Charles S. P. Foster<sup>1</sup>, Sebastián Duchêne<sup>2</sup>, Robert

6 Lanfear<sup>3</sup>, Simon Y. W. Ho<sup>1</sup>

7

8 <sup>1</sup>*School of Life and Environmental Sciences, University of Sydney, Sydney, NSW 2006,*

9 *Australia*

10 <sup>2</sup>*Dept of Biochemistry and Molecular Biology, Bio21 Molecular Sciences and Biotechnology*

11 *Institute, The University of Melbourne, Melbourne, VIC 3010, Australia*

12 <sup>3</sup>*Ecology and Evolution, Research School of Biology, Australian National University,*

13 *Canberra, ACT 2601, Australia*

14

15 \*Corresponding author

16 David A. Duchêne

17 School of Life and Environmental Sciences

18 University of Sydney

19 Sydney, NSW 2006

20 Australia

21 Telephone: +61 4 12026379

22 Email: david.duchene@sydney.edu.au

23 *Abstract* — Evolution leaves heterogeneous patterns of nucleotide variation across the  
24 genome, with different loci subject to varying degrees of mutation, selection, and drift.  
25 Appropriately modelling this heterogeneity is important for reliable phylogenetic inference.  
26 One modelling approach in statistical phylogenetics is to apply independent models of  
27 molecular evolution to different groups of sites, where the groups are usually defined by  
28 locus, codon position, or combinations of the two. The potential impacts of partitioning data  
29 for the assignment of substitution models are well appreciated. Meanwhile, the treatment of  
30 branch lengths has received far less attention. In this study, we examined the effects of  
31 linking and unlinking branch-length parameters across loci. By analysing a range of empirical  
32 data sets, we find that the best-fitting model for phylogenetic inference is consistently one in  
33 which branch lengths are proportionally linked: gene trees have the same pattern of branch-  
34 length variation, but with varying absolute tree lengths. This model provided a substantially  
35 better fit than those that either assumed identical branch lengths across gene trees or that  
36 allowed each gene tree to have its own distinct set of branch lengths. Using simulations, we  
37 show that the fit of the three different models of branch lengths varies with the length of the  
38 sequence alignment and with the number of taxa in the data set. Our findings suggest that a  
39 model with proportionally linked branch lengths across loci is likely to provide the best fit  
40 under the conditions that are most commonly seen in practice. In future work, improvements  
41 in fit might be afforded by models with levels of complexity intermediate to proportional and  
42 free branch lengths. The results of our study have implications for model selection,  
43 computational efficiency, and experimental design in phylogenomics.

44

45 **Keywords**

46 Substitution model, data partitioning, among-lineage rate variation, model selection,  
47 phylogenomics.

48           Molecular evolution is heterogeneous across the genome. This poses a challenge for  
49 statistical phylogenetic analyses of multilocus data sets, because they rely on explicit models  
50 of the evolutionary process (Sullivan and Joyce 2005). There has been considerable interest  
51 in the impact of model choice on estimates of evolutionary parameters, such as the tree  
52 topology and branch lengths (Steel 2005). For example, an important step in most  
53 phylogenetic analyses is choosing a substitution model that captures sufficient variation in  
54 the evolutionary process without overfitting the data (Sullivan and Joyce 2005). The task of  
55 selecting an appropriate phylogenetic model is especially complex for genome-scale data  
56 sets, because the number of potential model combinations becomes astronomical (Lanfear et  
57 al. 2012). Therefore, it would be highly beneficial to identify any general principles that can  
58 help to improve model fit and performance, while maintaining the tractability of  
59 computational analysis.

60           In terms of model selection in phylogenetics, the models of nucleotide and amino acid  
61 substitution have received the largest amount of attention. Various methods have been  
62 proposed for identifying the best-fitting partitioning scheme for assigning substitution models  
63 to the different loci in the data set (e.g., Lanfear et al. 2012; Kalyaanamoorthy et al. 2017).  
64 One aspect of this process that is often overlooked, however, is deciding how to model  
65 variation in the pattern of branch lengths of the gene trees. These heterogeneities need to be  
66 considered carefully when comparing data-partitioning schemes for phylogenetic analysis. In  
67 our descriptions below, we assume that each locus is associated with a gene tree. We also  
68 assume that the topologies of these gene trees are identical across loci, such that they can  
69 only vary in their absolute length and the pattern of lengths of branches.

70           The simplest model of branch lengths assumes that they are *universally shared* across  
71 loci (Fig. 1a). This model has a length parameter for each of the  $2n-3$  branches in the  
72 (unrooted) tree, where  $n$  is the number of taxa. However, the model is unlikely to be realistic

73 because it assumes that all loci have evolved at identical rates, which contradicts the  
74 overwhelming evidence of rate variation across the genome (Bromham and Penny 2003).  
75 Nonetheless, this is a widely used model of branch-length variation in molecular  
76 phylogenetics. We can generalize the model slightly by allowing loci to have *proportionally*  
77 *linked* branch lengths. In such a model, the branch lengths share proportionality across gene  
78 trees, with variation in the summed lengths of these gene trees permitted (Fig. 1b; Yang  
79 1996; Nylander et al. 2004). In other words, all of the gene trees share the same relative  
80 branch lengths, but have evolved at different absolute rates. For an unrooted tree, this model  
81 of branch lengths has  $(L-1)+(2n-3)$  parameters, comprising a set of  $2n-3$  branch lengths for an  
82 arbitrarily chosen gene tree and the  $L-1$  relative rates of the remainder of the  $L$  loci. For each  
83 gene tree, the branch lengths can be obtained by multiplying the  $2n-3$  branch lengths of the  
84 ‘reference’ gene tree by the relative rate at the locus in question. This pattern in branch  
85 lengths can be regarded as the additive outcome of lineage effects and gene effects (Gillespie  
86 1991; Muse and Gaut 1997).

87         The third and most parameter-rich model of branch lengths allows each gene tree to  
88 have a distinct set of branch lengths (Fig. 1c). This model assumes *unlinked* branch lengths  
89 and has  $L \cdot (2n-3)$  parameters. At first glance, this might seem to be the most realistic of the  
90 three models of branch lengths because we would expect different loci to evolve under  
91 varying degrees of selection and thus to have differing patterns of evolutionary rates across  
92 branches (Takahata 1987; Cutler 2000; Ho 2014). However, the number of parameters in the  
93 model increases rapidly with the number of loci, meaning that the model will have many  
94 parameters when applied to large, multilocus data sets. A biological mechanism that could  
95 give rise to this pattern is that in which selective constraints vary among genes and among  
96 lineages, known as gene-by-lineage interactions (Gillespie 1991; Muse and Gaut 1997).

97 The choice of branch-length model has the potential to affect the quality of  
98 phylogenetic inference (Marshall et al. 2006). However, the biological basis for choosing  
99 among the three models is not well understood. Some studies have suggested that loci vary  
100 little in terms of the patterns of branch lengths of their gene trees (Snir et al. 2012, 2014), but  
101 others have found evidence of substantial disparities (Bedford and Hartl 2008; Duchêne and  
102 Ho 2015).

103 Here, we compare the statistical fit and performance of the three models of branch  
104 lengths in phylogenetic analyses of multilocus data sets. These models vary in terms of  
105 whether branch lengths are universally shared, proportionally linked, or unlinked across loci.  
106 We combine these models of branch lengths with different partitioning schemes for  
107 substitution models. Our analyses of eight multilocus data sets and two phylogenomic data  
108 sets show that the best fit is usually provided by a model with proportionally linked branch  
109 lengths across loci. We also present a simulation study in which we demonstrate that the fit of  
110 the three models of branch lengths depends on the size of the data set.

111

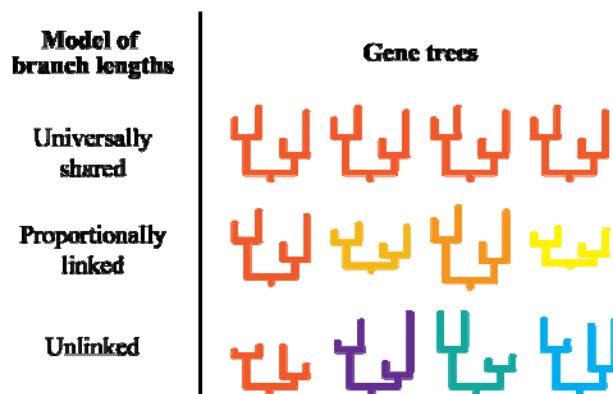

112

113 **FIGURE 1.** Models of branch lengths across gene trees. A model with *universally shared* branch lengths assumes  
114 a single set of branch lengths across gene trees. This model has  $2n-3$  branch-length parameters, where  $n$  is the  
115 number of taxa. A model with *proportionally linked* branch lengths assumes that the proportionality of branch  
116 lengths is maintained across gene trees. Nonetheless, variation in the summed branch lengths (tree lengths) is  
117 permitted through a scaling parameter per gene tree. This model contains  $(L-1)+(2n-3)$  parameters, where  $L$  is

118 the number of loci (assuming one gene tree per locus). A model with *unlinked* branch lengths assumes an  
119 independent set of branch lengths per gene tree, so it has  $L \cdot (2n-3)$  parameters.

120

## 121 **MATERIALS AND METHODS**

### 122 *Phylogenetic Models Used for Analysis*

123 We analysed a range of multilocus data sets using seven different partitioning  
124 treatments for branch lengths and substitution models (Table 1). Branch lengths were  
125 assumed to be universally shared (treatments 1–3), proportionally linked (treatments 4 and 5),  
126 or unlinked (treatments 6 and 7) across loci. For each model of branch lengths, we considered  
127 three methods of partitioning the data and selected substitution models from 88 possible  
128 models in the GTR+I+ $\Gamma$ +F family of models specified by the command `-m TEST` in the IQ-  
129 TREE software (Nguyen et al. 2015). First, we assumed a simple model in which all loci  
130 shared the same substitution model parameters and parameter values (treatment 1). Second,  
131 we used an automatic likelihood-based merging approach to select the partitioning scheme  
132 (treatments 2, 4, and 6 in Table 1; Lanfear et al. 2012; Kalyaanamoorthy et al. 2017). Third,  
133 we applied a partitioning scheme in which each locus has an independent substitution model  
134 (treatments 3, 5, and 7 in Table 1).

135 In the treatments with automated model selection, the chosen partitioning scheme had  
136 the potential to match those in some of the other treatments. This could occur if the method  
137 selected the simplest model, in which all loci shared the same substitution model and the  
138 same set of branch lengths. On the other hand, the method could select the most complex  
139 model, in which each locus had its own substitution model and own set of branch lengths.

140 **TABLE 1.** Models of branch lengths across gene trees, compared using multilocus and phylogenomic data sets.

141

| Treatment number IQ-TREE command | Model of branch lengths | Number of substitution models across loci | Number of tree lengths across loci | Number of branch-length patterns across loci | Potential equivalence to other models |
|----------------------------------|-------------------------|-------------------------------------------|------------------------------------|----------------------------------------------|---------------------------------------|
| (1) Not applicable               | Universally shared      | 1                                         | 1                                  | 1                                            | –                                     |
| (2) -TESTMERGE -q                | Universally shared      | $1 \leq x \leq L$                         | 1                                  | 1                                            | 1, 3                                  |
| (3) -TEST -q                     | Universally shared      | $L$                                       | 1                                  | 1                                            | –                                     |
| (4) -TESTMERGE -spp              | Proportionally linked   | $1 \leq x \leq L$                         | $1 \leq x \leq L$                  | 1                                            | 1, 2, 5                               |
| (5) -TEST -spp                   | Proportionally linked   | $L$                                       | $L$                                | 1                                            | –                                     |
| (6) -TESTMERGE -sp               | Unlinked                | $1 \leq x \leq L$                         | $1 \leq x \leq L$                  | $1 \leq x \leq L$                            | 1, 2, 4, 7                            |
| (7) -TEST -sp                    | Unlinked                | $L$                                       | $L$                                | $L$                                          | –                                     |

142

143  
144

**TABLE 2.** Data sets used for examining models of branch lengths across loci.

| <b>Taxonomic group</b> | <b>Common name</b>    | <b>Number of taxa</b> | <b>Number of loci</b> | <b>Number of sites</b>                | <b>Data type</b> | <b>Study reference</b> | <b>Data set reference (doi)</b> |
|------------------------|-----------------------|-----------------------|-----------------------|---------------------------------------|------------------|------------------------|---------------------------------|
| Dytiscidae             | Diving beetles        | 38                    | 3                     | 2111                                  | M,N              | Bergsten et al. (2013) | 10.5061/dryad.s631d             |
| Dasypodidae            | Armadillos            | 13                    | 5                     | 6070                                  | M,N              | Delsuc et al. (2003)   | 10.5061/dryad.1838              |
| <i>Ensatina</i>        | Salamanders           | 69                    | 2                     | 823                                   | M                | Devitt et al. (2013)   | 10.5061/dryad.k9g50             |
| Muscidae               | Flies                 | 39                    | 3                     | 1635                                  | M,N              | Dsouli et al. (2011)   | 10.5061/dryad.9025              |
| Chironomidae           | Midges                | 74                    | 4                     | 2701                                  | M,N              | Ekrem et al. (2010)    | 10.1016/j.ympev.2010.06.006     |
| Saxifragales           | Part of core eudicots | 40                    | 5                     | 9005                                  | C,N              | Fishbein et al. (2001) | 10.5061/dryad.684               |
| <i>Nothophagus</i>     | Beeches               | 51                    | 6                     | 5444                                  | C,N              | Sauquet et al. (2012)  | 10.5061/dryad.qq106tm4          |
| <i>Lycodon</i>         | Wolf snakes           | 61                    | 3                     | 2697                                  | M,N              | Siler et al. (2013)    | 10.5061/dryad.cp6gg             |
| Neornithes             | Modern birds          | 161–200               | 255                   | 361–2316 (mean = 1524, median = 1636) | N                | Prum et al. (2015)     | 10.5281/zenodo.28343            |
| Marsupialia            | Marsupials            | 35                    | 1500                  | 141–3660 (mean = 559.3, median = 429) | N                | Duchêne et al. (2018)  | 10.5061/dryad.353q5             |

145 M = mitochondrial; N = nuclear; C = chloroplast.



146

147 *Multilocus and Phylogenomic Data*

148         We applied each of the seven treatments of branch lengths and substitution models to  
149 eight multilocus data sets that represented a diverse range of animals and plants. The data sets  
150 were taken from an existing curated compilation of data (Table 2; Kainer and Lanfear 2015),  
151 and each comprised nucleotide sequences from between two and six loci. The sequence  
152 alignments are available from Figshare ([doi.org/10.6084/m9.figshare.991367](https://doi.org/10.6084/m9.figshare.991367)).

153         We also analysed two phylogenomic data sets that each comprised sequences from  
154 hundreds of loci (Table 2). The first data set consisted of sequences of a mixture of coding  
155 and non-coding regions from up to 200 bird species, representing all of the major extant  
156 lineages (Prum et al. 2015). The second data set comprised exon sequences from 35  
157 marsupials, representing 18 of the 22 extant families (Duchêne et al. 2018). Each exon was  
158 further partitioned by codon position. We randomly split the phylogenomic data into  
159 alignments of 15 loci each to gain insight into the variation within them and for  
160 computational efficiency. The bird data and marsupial data were thus split into 17 and 300  
161 smaller data sets, respectively.

162         We analysed each data set using maximum likelihood in IQ-TREE v1.6.7 (Nguyen et  
163 al. 2015), under each of the seven treatments described above (Table 1). The fit of the seven  
164 models was compared using the Bayesian information criterion (BIC). Under each treatment,  
165 we also examined estimates of evolutionary parameters, including the sum of the inferred  
166 branch lengths (tree length) and the proportional contribution of internal branches to the tree  
167 length (stemminess; Fiala and Sokal 1985). For analyses of each data set, we computed the  
168 path-distance metric between trees (Steel and Penny 1993) in a pairwise fashion across  
169 models of branch lengths. For the two phylogenomic data sets, we also compared each  
170 topological estimate with the maximum-likelihood estimate from the total data set, as

171 reported in the original phylogenomic studies (Prum et al. 2015; Duchêne et al. 2018). We  
172 report comparisons across trees for each data set using multidimensional scaling of the  
173 pairwise distances between trees in two dimensions. The data sets, scripts used for analysis,  
174 and output files are available online ([github.com/duchene/branch\\_length\\_models](https://github.com/duchene/branch_length_models)).

175

### 176 *Simulation Study*

177 We conducted a simulation study to test for an association between the fit of different  
178 models of branch lengths and the length of sequences and number of taxa in the data set. As  
179 sequence length increases, there is more information available to identify the underlying  
180 evolutionary model. Similarly, an increasing number of taxa provides more information about  
181 the possible distribution of branch lengths, although a model with unlinked branch lengths  
182 across loci will gain large numbers of additional parameters. To explore the patterns of model  
183 support across these variables, we simulated sequence evolution along trees with varying  
184 numbers of taxa (4, 8, 16, and 32) and per-locus sequence length (500, 1000, 2000, and 4000  
185 nucleotides). We started from symmetric time-trees with branch lengths of 10 million years  
186 (Myr). To convert these trees into phylograms, we multiplied the branch lengths (in time  
187 units) by branch rates drawn from a lognormal distribution using the R package NELSI (Ho  
188 et al. 2015). The scripts of the NELSI package are available online  
189 ([github.com/sebastianduchene/NELSI](https://github.com/sebastianduchene/NELSI)), as are the scripts used for simulations and the output  
190 of our analyses ([github.com/duchene/branch\\_length\\_models](https://github.com/duchene/branch_length_models)).

191 Using the framework described above, we simulated sequence evolution to produce  
192 pairs of loci under three different models of branch lengths. In the first model, the two gene  
193 trees had unlinked branch lengths but shared the same sum of branch lengths (tree length).  
194 Each set of branch rates was drawn from a lognormal distribution with mean 0.01  
195 substitutions/site/Myr and log standard deviation of 0.2. In the second model, the two gene

196 trees had proportionally linked branch lengths. This involved the two trees having the same  
197 pattern of branch-length variation but different tree lengths. The substitution rates of the two  
198 loci were 0.01 and 0.011 substitutions/site/Myr, without any rate variation across branches. In  
199 the third and final model, the two gene trees had unlinked branch lengths with different tree  
200 lengths. In this case, the two sets of branch rates were drawn from distributions with means  
201 of 0.01 and 0.011 substitutions/site/Myr, both with a log standard deviation of 0.2. This  
202 scenario is expected to be the most realistic representation of the evolutionary process. After  
203 the branch rates had been assigned, they were multiplied by the branch lengths of the time-  
204 trees. The resulting phylograms were used for our simulations of sequence evolution, which  
205 were performed using a Jukes-Cantor substitution model in the R package phangorn (Schliep  
206 2011).

207 We generated 100 sets of branch rates and sequence alignments under each of the 48  
208 combinations of branch-length model, number of taxa, and per-locus sequence length. The  
209 sequence alignments were then analysed using IQ-TREE. We used the BIC to compare the fit  
210 of three models of branch lengths, in which branch lengths were universally shared,  
211 proportionally linked, or unlinked across loci. In all cases, we assigned a separate substitution  
212 model to each locus. These scenarios correspond to treatments 3, 5, and 7 in our analyses of  
213 empirical data (Table 1). We also calculated the tree lengths and stemminess for the inferred  
214 trees and compared these with the metrics computed from the trees used for simulations of  
215 sequence evolution.

216

## 217 **RESULTS**

### 218 *Multilocus and Phylogenomic Data*

219 In our analyses of multilocus and phylogenomic data sets, we found that the simplest  
220 model of universally shared branch lengths (treatment 1) provided a generally poorer fit than

221 most other treatments (Fig. 2). As expected, this model also tended to have the lowest  
 222 likelihood, and automatic model selection based on BIC rarely chose this model  
 223 (Supplementary Fig. S1). For several data sets, including most of the multilocus data sets and  
 224 the phylogenomic data set from birds, this model also led to longer terminal branches  
 225 compared with the gene trees inferred using other models (Supplementary Fig. S1). In the  
 226 case of some multilocus data sets, the simplest branch-length model also led to an estimate of  
 227 the tree topology that was different from those obtained using the more complex models (Fig.  
 228 3a, 3f, and 3g).  
 229

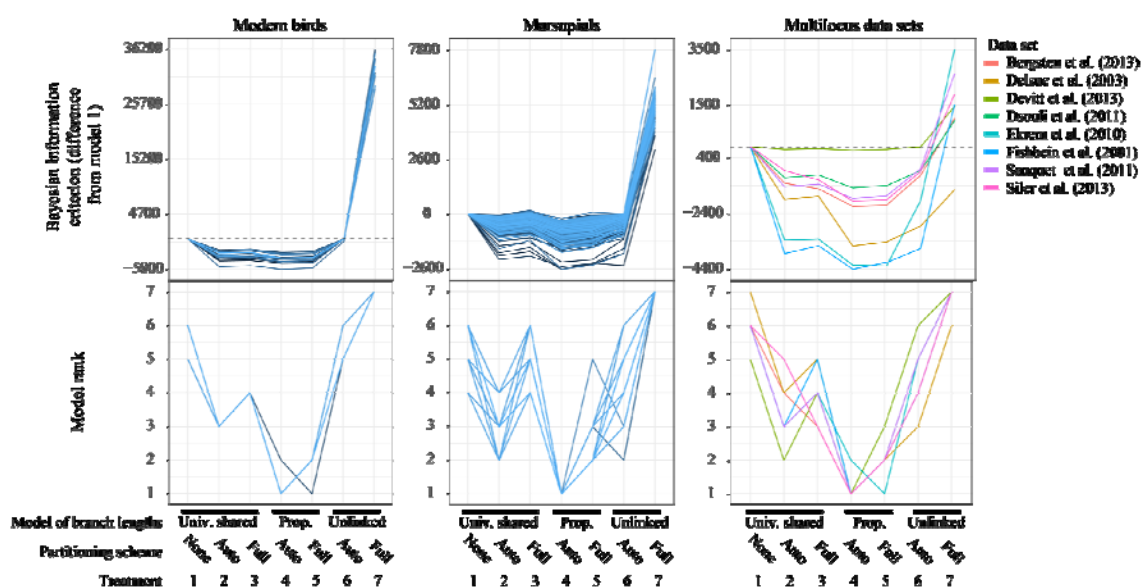

230  
 231  
 232 **FIGURE 2.** Statistical fit of seven models of nucleotide substitution and branch lengths across loci. The top row  
 233 shows the relative statistical support for each treatment, measured in terms of the difference in the Bayesian  
 234 information criterion (BIC) score from the simplest treatment (treatment 1). The bottom row shows the rank of  
 235 each treatment in terms of its BIC score, with 1 representing the best-fitting treatment and 7 representing the  
 236 worst-fitting treatment. Results are shown for analyses of eight multilocus and two phylogenomic data sets. The  
 237 phylogenomic data comprise 17 data sets from birds and 300 data sets from marsupials. Each of these data sets  
 238 comprises nucleotide sequences from 15 loci.  
 239  
 240

241

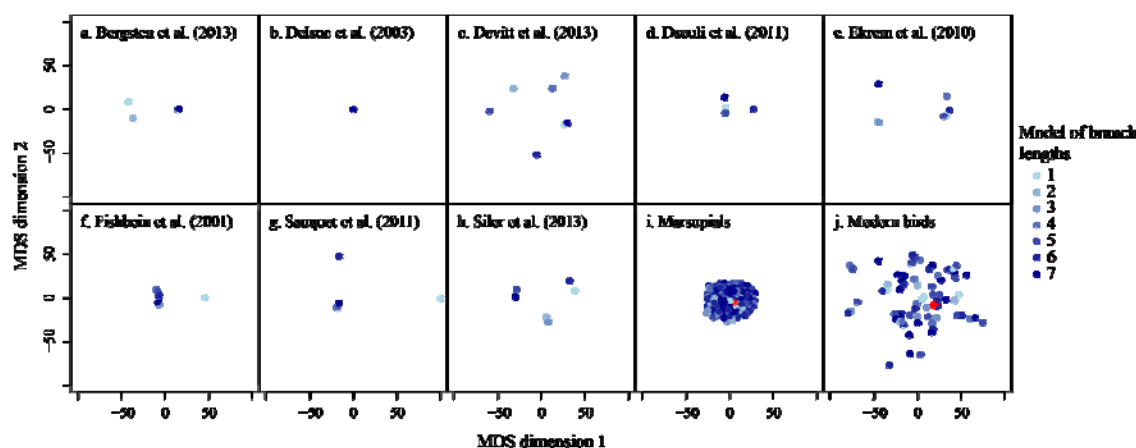

242  
243

FIGURE 3. Two-dimensional representations of the topological path-distance between the trees inferred using

244 each of the seven models of branch lengths. Distances between trees are represented after performing  
245 dimensionality reduction using multi-dimensional scaling (MDS). Red points in panels i and j indicate the  
246 maximum-likelihood estimates from the phylogenomic studies that first reported the data sets from marsupials  
247 (i) and modern birds (j).

248

249 A model with proportionally linked branch lengths (treatments 4 and 5) yielded the  
250 lowest BIC scores across the empirical data sets examined (Fig. 2). Specifically, the best-  
251 fitting model was the one in which branch lengths were proportionally linked and in which  
252 selection of the partitioning scheme was automated (treatment 4; Table 1). In addition to  
253 yielding the lowest BIC scores, the model with proportionally linked branch lengths tended to  
254 produce gene trees that were comparatively short, but with intermediate stemminess and  
255 levels of branch support (Supplementary Fig. S1). The second-best statistical fit was provided  
256 by a model in which branch lengths are shared across all loci, but where a separate  
257 substitution model is assigned to each locus.

258 The model with unlinked branch lengths across loci (treatment 7), which contained  
259 the largest number of parameters, consistently provided the poorest fit across all of the  
260 empirical data sets according to BIC scores (Fig. 2). Although this model had the highest  
261 likelihood (Supplementary Fig. S1), the penalty for its large number of parameters

262 outweighed its improvement in likelihood. Nevertheless, this parameter-rich model did not  
263 lead to particularly distinct topological inferences, nor to greater distances from the reference  
264 bird and marsupial topologies when compared with the other models of branch lengths (Fig.  
265 3).

266         The poor performance of the most complex model of branch lengths is also evidenced  
267 by the fact that automatic model selection often chose the simplest model (universally shared  
268 branch lengths). For the bird phylogenomic data, analyses using the most complex model  
269 consistently led to a greater contribution of internal branches to total tree length, lower mean  
270 bootstrap support across nodes, and a greater range in bootstrap support values across nodes  
271 (Supplementary Fig. S1).

272

### 273 *Simulation Study*

274         In our analyses of sequence data generated by simulation, we found the expected  
275 pattern of an increasing preference for more parameter-rich models of branch lengths with  
276 increasing sequence length (Fig. 4). We also found that parameter-rich models were  
277 frequently selected when the data had increasing numbers of taxa. Regardless of the  
278 simulation conditions, a simple model with universally shared branch lengths was usually  
279 preferred when the sequences were very short (500 nucleotides) and when there were fewer  
280 than 32 taxa in the data set.

281         Under our first simulation scenario, in which loci had evolved with unlinked branch  
282 lengths but with the same tree length, the correct model of branch lengths was only preferred  
283 when each locus was 4000 nucleotides in length (Fig. 4a). In the second simulation scenario,  
284 in which the gene trees of the two loci had linked branch lengths with different tree lengths,  
285 the correct model of proportionally linked branch lengths was preferred when the number of  
286 taxa was greater than four (Fig. 4b). Finally, in the third simulation scenario, in which the

287 two loci had gene trees with unlinked branch lengths and different tree lengths, the correct  
288 model with unlinked branch lengths was preferred when the loci were 4000 nucleotides in  
289 length (Fig. 4c). For shorter sequences and large numbers of taxa, a model with  
290 proportionally linked branch lengths was often chosen.  
291

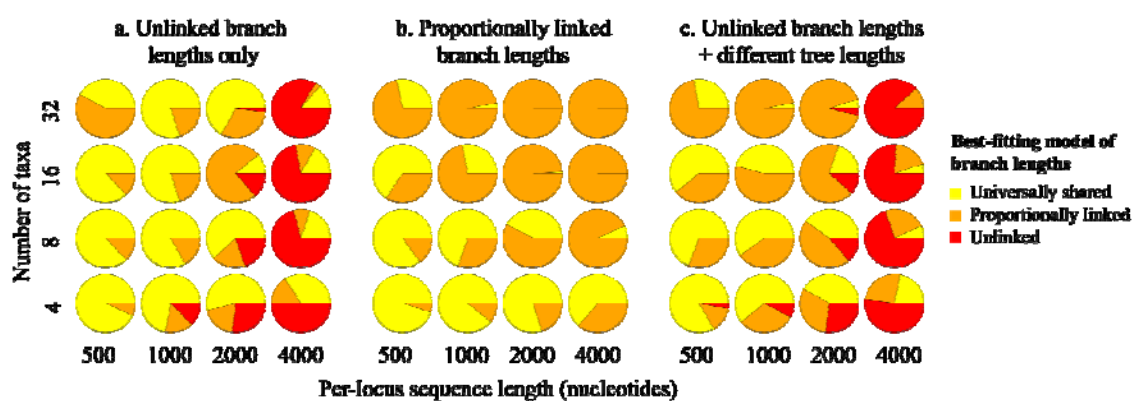

292  
293  
294 **FIGURE 4.** Comparison of branch-length models for two-locus data sets generated by simulation under three  
295 scenarios: (a) different patterns of branch lengths but identical tree lengths across gene trees; (b) identical  
296 patterns of branch lengths but different tree lengths across gene trees; and (c) different patterns of branch  
297 lengths and different tree lengths across gene trees. Each pie chart shows the proportion of 100 replicates for  
298 which each of the three models of branch lengths was selected using the Bayesian information criterion.  
299

300 Across our simulation scenarios, we found branch-length estimates to be close to the  
301 true values (mean across loci), regardless of the model of branch lengths that was used for  
302 analysis (Supplementary Figs. S2–S3). For each scenario, the best-fitting model did not  
303 consistently lead to the most accurate estimates of branch lengths (Supplementary Figs. S4–  
304 S5). Nonetheless, analysing the data using a model with universally shared branch lengths  
305 almost always yielded shorter gene trees, which often had short internal branches compared  
306 with the trees inferred using other models of branch lengths (Supplementary Figs. S6–S7). In  
307 addition to highly accurate estimates of branch lengths, the tree topology was estimated  
308 correctly in every analysis. These outcomes are likely to reflect the fact that we explored a

309 relatively narrow set of simulation parameters, despite this range being sufficient to produce  
310 variable impacts on model selection.

311

## 312 **DISCUSSION**

313 Our study has demonstrated that some degree of data partitioning is appropriate for  
314 improving model fit in phylogenetic analyses of multilocus data sets. In particular, our  
315 phylogenetic analyses of a range of empirical data sets showed that a model with  
316 proportionally linked branch lengths almost always provided the best fit. This outcome  
317 suggests that the dominant form of evolutionary rate variation that is being appropriately  
318 modelled is that across loci (i.e., gene effects), whereas the pattern of rate heterogeneity  
319 among branches does not vary enough across loci to warrant the use of a parameter-rich  
320 model with unlinked branch lengths. The model with proportionally linked branch lengths  
321 that was most often favoured in our analyses is available in several software packages (e.g.,  
322 PhyML, Guindon et al. 2010; IQ-TREE, Nguyen et al. 2015), but not in others (RAxML,  
323 Stamatakis 2014).

324 Our results are broadly consistent with those of previous studies that identified biases  
325 in phylogenetic inference caused by underparameterization of the substitution model (Yang  
326 1996; Lemmon and Moriarty 2004; Brandley et al. 2005; Revell et al. 2005; Marshall et al.  
327 2006; Kainer and Lanfear 2015). Nonetheless, we have also found that unlinking branch  
328 lengths across loci incurs a substantial cost by introducing large numbers of parameters,  
329 leading to poor model fit. Unlinking branch lengths across loci led to estimates of topology  
330 and branch lengths with greater uncertainty than did models with intermediate numbers of  
331 branch-length parameters.

332 One way to identify an appropriate level of parameterization is to consider models of  
333 branch lengths with intermediate complexity to those considered here. For example, rather



334 than estimating a separate, unlinked set of branch lengths for each locus, one might consider  
335 a model in which an intermediate number of groups of unlinked branch lengths are estimated.  
336 Each group of branch lengths can then be applied to multiple loci with a rate multiplier (i.e.,  
337 proportional branch lengths) for each locus in the set. Some existing programs allow the  
338 specification of such intermediate models (e.g., PhyML Guindon et al. 2010). However, an  
339 algorithm to optimize the number of groups of unlinked branch lengths and their assignment  
340 to loci remains unavailable.

341         The results of our simulation study show that the most parameter-rich models are  
342 favoured only under certain conditions. Unlinking branch lengths across loci is an appropriate  
343 strategy only for data sets that comprise long sequences from moderate to large numbers of  
344 taxa (at least 32 taxa in our simulations). These large data sets contain the greatest amount of  
345 information about the distribution of rates across taxa. However, we would expect that a  
346 model with fully unlinked branch lengths would be strongly disfavoured for data sets with  
347 large numbers of loci, such as those encountered in phylogenomic studies.

348         Our study provides some insights into the importance of accounting for heterogeneity  
349 in molecular evolution across the genome. Variation in patterns of branch lengths across loci,  
350 as modelled in treatments 6 and 7 in our analyses, are the product of interactions between  
351 gene effects and lineage effects (Gillespie 1991; Cutler 2000; Gaut et al. 2011). Given that  
352 this description of rate variation across loci is perhaps the most biologically plausible, it is  
353 striking that the performance of this model is consistently poor across a wide range of  
354 multilocus data sets. One explanation for this result is that drivers of rate heterogeneity across  
355 lineages (e.g., differences in generation time) are largely independent of drivers of rate  
356 heterogeneity across loci (e.g., selective constraints). However, a more likely reason for the  
357 rejection of unlinked branch lengths is that such a model can involve enormous numbers of  
358 parameters, especially when the data set contains a large number of loci. As observed in our

359 simulation study, this model is preferred only when each locus has a large number of  
360 nucleotide sites.

361         The findings of our study have implications for the use of clock models in molecular  
362 dating. Clock models describe the pattern of rate variation across the phylogeny, with relaxed  
363 clocks allowing a distinct rate along each branch (Ho and Duchêne 2014). When a separate  
364 relaxed-clock model is assigned to each locus, the number of parameters grows rapidly. Some  
365 studies have indicated that the careful assignment of a small number of clock models to  
366 subsets of the data can yield substantial improvements in model fit (e.g., Ho and Lanfear  
367 2010; Duchêne and Ho 2014). However, the precision of divergence-time estimates is  
368 expected to improve with the number of loci (Zhu et al. 2015; Foster and Ho 2017; Angelis et  
369 al. 2018). Our results suggest that allowing different loci to share a single clock model is a  
370 reasonable approach, provided that the loci are allowed to have different relative rates. This  
371 approach is analogous to the model with proportionally linked branch lengths that has been  
372 considered here.

373         One of the assumptions in our analyses is that all of the loci have gene trees with  
374 identical topologies. This excludes the possibility of gene-tree discordance caused by  
375 incomplete lineage sorting, hybridization, or introgression. Discordance among gene trees  
376 leads to statistical inconsistency in phylogenetic analyses of concatenated data sets (Kubatko  
377 et al. 2007), and should be explicitly considered where possible (Mirarab et al. 2016).  
378 Forcing incongruent gene trees to share the same topology leads to distortions in the  
379 estimates of branch lengths (Mendes and Hahn 2016). Under these conditions, we might  
380 expect to see greater support for unlinking branch lengths across loci. The effect of variation  
381 in the topological signal across loci on models of branch lengths will require further  
382 investigation. Nonetheless, our results suggest that the variation in rates across loci and

383 lineages will often be well approximated by a model with proportionally linked branch  
384 lengths in analyses of concatenated sequence data.

385

## 386 **CONCLUSIONS**

387 Our study has demonstrated the superior performance of phylogenetic models that  
388 proportionally link branch lengths across loci and that automate the process of selecting the  
389 data-partitioning scheme. Under- and overparameterization of the branch lengths across the  
390 gene trees can have negative impacts on phylogenetic analyses of multilocus data sets. For  
391 this reason, we recommend that proportionally linking branch lengths should be the default  
392 approach to analysing multilocus data sets. Our recommendations can be extended to  
393 phylogenomic data sets comprising large numbers of loci and taxa. Further examinations of  
394 the impact of branch-length models on divergence-time estimates, along with the effects of  
395 gene-tree discordance, are likely to be useful for improving the accuracy and precision of  
396 phylogenomic inferences.

397

## 398 **ACKNOWLEDGEMENTS**

399 This work was supported by funding from the Australian Research Council to D.A.D. and  
400 S.Y.W.H. (grant DP160104173). S.D. was supported by a McKenzie Fellowship from the  
401 University of Melbourne. The authors acknowledge the Sydney Informatics Hub and the  
402 University of Sydney's high performance computing cluster Artemis for providing the high-  
403 performance computing resources that have contributed to the research results reported in this  
404 paper.

405

406 **LITERATURE CITED**

- 407 Angelis K., Álvarez-Carretero S., Dos Reis M., Yang Z. 2018. An evaluation of different  
408 partitioning strategies for Bayesian Estimation of species divergence times. *Syst. Biol.*  
409 67:61–77.
- 410 Bedford T., Hartl D.L. 2008. Overdispersion of the molecular clock: Temporal variation of  
411 gene-specific substitution rates in *Drosophila*. *Mol. Biol. Evol.* 25:1631–1638.
- 412 Bergsten J., Nilsson A.N., Ronquist F. 2013. Bayesian tests of topology hypotheses with an  
413 example from diving beetles. *Syst. Biol.* 62:660–673.
- 414 Brandley M.C., Schmitz A., Reeder T.W. 2005. Partitioned Bayesian analyses, partition  
415 choice, and the phylogenetic relationships of scincid lizards. *Syst. Biol.* 54:373–390.
- 416 Bromham L., Penny D. 2003. The modern molecular clock. *Nat. Rev. Genet.* 4:216–224.
- 417 Cutler D.J. 2000. Understanding the overdispersed molecular clock. *Genetics.* 154:1403–  
418 1417.
- 419 Delsuc F., Stanhope M.J., Douzery E.J.. 2003. Molecular systematics of armadillos  
420 (*Xenarthra*, *Dasypodidae*): contribution of maximum likelihood and Bayesian analyses  
421 of mitochondrial and nuclear genes. *Mol. Phylogenet. Evol.* 28:261–275.
- 422 Devitt T.J., Devitt S.E.C., Hollingsworth B.D., McGuire J.A., Moritz C. 2013. Montane  
423 refugia predict population genetic structure in the Large-blotched *Ensatina* salamander.  
424 *Mol. Ecol.* 22:1650–1665.
- 425 Dsouli N., Delsuc F., Michaux J., De Stordeur E., Couloux A., Veuille M., Duvallet G. 2011.  
426 Phylogenetic analyses of mitochondrial and nuclear data in haematophagous flies  
427 support the paraphyly of the genus *Stomoxys* (Diptera: Muscidae). *Infect. Genet. Evol.*  
428 11:663–670.
- 429 Duchêne D.A., Bragg J.G., Duchêne S., Neaves L.E., Potter S., Moritz C., Johnson R.N., Ho  
430 S.Y.W., Eldridge M.D.B. 2018. Analysis of phylogenomic tree space resolves

- 431 relationships among marsupial families. *Syst. Biol.* 67:400–412.
- 432 Duchêne S., Ho S.Y.W. 2014. Using multiple relaxed-clock models to estimate evolutionary  
433 timescales from DNA sequence data. *Mol. Phylogenet. Evol.* 77:65–70.
- 434 Duchêne S., Ho S.Y.W. 2015. Mammalian genome evolution is governed by multiple  
435 pacemakers. *Bioinformatics.* 31:2061–2065.
- 436 Ekrem T., Stur E., Hebert P.D.N. 2010. Females do count: Documenting Chironomidae  
437 (Diptera) species diversity using DNA barcoding. *Org. Divers. Evol.* 10:397–408.
- 438 Fiala K.L., Sokal R.R. 1985. Factors determining the accuracy of cladogram estimation:  
439 evaluation using computer simulation. *Evolution.* 39:609–622.
- 440 Fishbein M., Hibsich-Jetter C., Soltis D.E., Hufford L., Baum D. 2001. Phylogeny of  
441 Saxifragales (Angiosperms, Eudicots): analysis of a rapid, ancient radiation. *Syst. Biol.*  
442 50:817–847.
- 443 Foster C.S.P., Ho S.Y.W. 2017. Strategies for partitioning clock models in phylogenomic  
444 dating: application to the Angiosperm evolutionary timescale. *Genome Biol. Evol.*  
445 9:2752–2763.
- 446 Gaut B., Yang L., Takuno S., Eguiarte L.E. 2011. The patterns and causes of variation in  
447 plant nucleotide substitution rates. *Annu. Rev. Ecol. Evol. Syst.* 42:245–266.
- 448 Gillespie J. 1991. *The Causes of Molecular Evolution*. New York: Oxford University Press.
- 449 Guindon S., Dufayard J.-F., Lefort V., Anisimova M., Hordijk W., Gascuel O. 2010. New  
450 algorithms and methods to estimate maximum-likelihood phylogenies: assessing the  
451 performance of PhyML 3.0. *Syst. Biol.* 59:307–321.
- 452 Ho S.Y.W. 2014. The changing face of the molecular evolutionary clock. *Trends Ecol. Evol.*  
453 29:496–503.
- 454 Ho S.Y.W., Duchêne S. 2014. Molecular-clock methods for estimating evolutionary rates and  
455 timescales. *Mol. Ecol.* 23:5947–5965.

- 456 Ho S.Y.W., Duchêne S., Duchêne D.A. 2015. Simulating and detecting autocorrelation of  
457 molecular evolutionary rates among lineages. *Mol. Ecol. Resour.* 15:688–696.
- 458 Ho S.Y.W., Lanfear R. 2010. Improved characterisation of among-lineage rate variation in  
459 cetacean mitogenomes using codon-partitioned relaxed clocks. *Mitochondrial DNA.*  
460 21:138–146.
- 461 Kainer D., Lanfear R. 2015. The effects of partitioning on phylogenetic inference. *Mol. Biol.*  
462 *Evol.* 32:1611–1627.
- 463 Kalyaanamoorthy S., Minh B.Q., Wong T.K.F., von Haeseler A., Jermini L.S. 2017.  
464 ModelFinder: fast model selection for accurate phylogenetic estimates. *Nat. Methods.*  
465 14:587–589.
- 466 Kubatko L.S., Degnan J.H., Collins T. 2007. Inconsistency of phylogenetic estimates from  
467 concatenated data under coalescence. *Syst. Biol.* 56:17–24.
- 468 Lanfear R., Calcott B., Ho S.Y.W., Guindon S. 2012. Partitionfinder: combined selection of  
469 partitioning schemes and substitution models for phylogenetic analyses. *Mol. Biol. Evol.*  
470 29:1695–1701.
- 471 Lemmon A.R., Moriarty E.C. 2004. The importance of proper model assumption in bayesian  
472 phylogenetics. *Syst. Biol.* 53:265–277.
- 473 Marshall D., Simon C., Buckley T. 2006. Accurate branch length estimation in partitioned  
474 Bayesian analyses requires accommodation of among-partition Rate variation and  
475 attention to branch length priors. *Syst. Biol.* 55:993–1003.
- 476 Mendes F.K., Hahn M.W. 2016. Gene tree discordance causes apparent substitution rate  
477 variation. *Syst. Biol.* 65:711–721.
- 478 Mirarab S., Bayzid M.S., Warnow T. 2016. Evaluating summary methods for multilocus  
479 species tree estimation in the presence of incomplete lineage sorting. *Syst. Biol.* 65:366–  
480 80.

- 481 Muse S. V., Gaut B.S. 1997. Comparing patterns of nucleotide substitution rates among  
482 chloroplast loci using the relative ratio test. *Genetics*. 146:393–399.
- 483 Nguyen L.-T., Schmidt H.A., von Haeseler A., Minh B.Q. 2015. IQ-TREE: A fast and  
484 effective stochastic algorithm for estimating maximum-likelihood phylogenies. *Mol.*  
485 *Biol. Evol.* 32:268–274.
- 486 Nylander J., Ronquist F., Huelsenbeck J., Nieves-Aldery J. 2004. Bayesian phylogenetic  
487 analysis of combined data. *Syst. Biol.* 53:47–67.
- 488 Prum R.O., Berv J.S., Dornburg A., Field D.J., Townsend J.P., Lemmon E.M., Lemmon A.R.  
489 2015. A comprehensive phylogeny of birds (Aves) using targeted next-generation DNA  
490 sequencing. *Nature*. 526:569–573.
- 491 Revell L., Harmon L., Glor R. 2005. Under-parameterized model of sequence evolution leads  
492 to bias in the estimation of diversification rates from molecular phylogenies. *Syst. Biol.*  
493 54:973–983.
- 494 Sauquet H., Ho S.Y.W., Gandolfo M.A., Jordan G.J., Wilf P., Cantrill D.J., Bayly M.J.,  
495 Bromham L., Brown G.K., Carpenter R.J., Lee D.M., Murphy D.J., Sniderman J.M.K.,  
496 Udovicic F. 2012. Testing the impact of calibration on molecular divergence times using  
497 a fossil-rich group: the case of *Nothofagus* (Fagales). *Syst. Biol.* 61:289–313.
- 498 Schliep K.P. 2011. PHANGORN: phylogenetic analysis in R. *Bioinformatics*. 27:592–593.
- 499 Siler C.D., Oliveros C.H., Santanen A., Brown R.M. 2013. Multilocus phylogeny reveals  
500 unexpected diversification patterns in Asian wolf snakes (genus *Lycodon*). *Zool. Scr.*  
501 42:262–277.
- 502 Snir S., Wolf Y.I., Koonin E. V. 2014. Universal pacemaker of genome evolution in animals  
503 and fungi and variation of evolutionary rates in diverse organisms. *Genome Biol. Evol.*  
504 6:1268–1278.
- 505 Snir S., Wolf Y.I., Koonin E. V. 2012. Universal pacemaker of genome evolution. *PLOS*

- 506           Comput. Biol. 8:e1002785.
- 507   Stamatakis A. 2014. RAxML version 8: a tool for phylogenetic analysis and post-analysis of  
508           large phylogenies. *Bioinformatics*. 30:1312–1313.
- 509   Steel M.A. 2005. Should phylogenetic models be trying to “fit an elephant”? *Trends Genet.*  
510           21:307–309.
- 511   Steel M.A., Penny D. 1993. Distributions of tree comparison metrics - some new results.  
512           *Syst. Biol.* 42:126–141.
- 513   Sullivan J., Joyce P. 2005. Model selection in phylogenetics. *Annu. Rev. Ecol. Evol. Syst.*  
514           36:445–466.
- 515   Takahata N. 1987. On the overdispersed molecular clock. *Genetics*. 116:169–179.
- 516   Yang Z. 1996. Among-site rate variation and its impact on phylogenetic analyses. *Trends*  
517           *Ecol. Evol.* 11:367–372.
- 518   Zhu T., Dos Reis M., Yang Z. 2015. Characterization of the uncertainty of divergence time  
519           estimation under relaxed molecular clock models using multiple loci. *Syst. Biol.*  
520           64:267–280.
- 521
